# Supplementary material for: Semi-Supervised Clustering for Identification of MCI and Dementia Cohorts with a Brief Digital Cognitive Assessment
Source: Research Square preprint supplement (doi:10.21203/rs.3.rs-8532476/v1), 2026-01-13
Supplement: Supplementary file 1 [file 13abdb4d83949459e0b855b6.docx]

# Details of Gold-Standard Diagnostic Assessment

Data for the labeled “Rowan” dataset was from patients who were visited at a memory clinic at the Rowan University / Virtua New Jersey Institute for Successful Aging. Patients underwent comprehensive neuropsychological testing, including a clinical interview with the patient and his/her care partner (if applicable). The neuropsychological protocol assessed executive control/working memory, information processing speed, general intellectual abilities, language/lexical access, visuospatial abilities, visuoconstructional skills, and verbal episodic memory. These neuropsychological tests were expressed as z-scores derived from available normative data or demographically corrected scores in the literature. The neuropsychological tests and their relevant subtests that were used to classify the patients into CU, MCI, and dementia groups included the following: Boston Naming Test, California Verbal Learning Test Long Delay Free Recall and Recognition Discriminability, Kaufman Brief Neuropsychological Assessment Sequence Subtest, Wechsler Adult Intelligence Scale-IV Digits Forward and Backward, Wechsler Adult Intelligence Scale-III Similarities Subtest, Wechsler Memory Scale-IV Symbol Span Subtest, and instrumental activities of daily living.
